# Supplementary material for: Highly dispersed Ru immobilized on Ni-modified Al2O3 for selective hydrogenation of bisphenol A to hydrogenated bisphenol A
Source: Royal Society of Chemistry journal article supplement (doi:10.1039/d4nj04091k), 2024-11-14
Supplement: d4nj04091k1.pdf [file d4nj04091k1.pdf]

## Supporting Information

### **Highly dispersed Ru immobilized on Ni-modified Al<sub>2</sub>O<sub>3</sub> for selective hydrogenation of bisphenol A to hydrogenated bisphenol A**

Shufeng Lin, Zhonghua Sun\*, Zhenzhen Wang, Qiumin Zhou, Anwei Wang, Zhong Wu, Junfeng Qian, Mingyang He and Qun Chen

Jiangsu Key Laboratory of Advanced Catalytic Materials and Technology, Advanced Catalysis and Green Manufacturing Collaborative Innovation Center, Changzhou University, Changzhou 213164, Jiangsu, China.

\*Corresponding author: sunzhonghua@cczu.edu.cn (Z. Sun).

**This file includes:**

Fig. S1 to S7

Table S1 to S3

Supplementary reference

**Fig. S1** Hydrogenation device of BPA.

**Fig. S2** N<sub>2</sub> adsorption-desorption isotherms and corresponding pore size distributions of catalysts with varied Ni doping amounts.

**Fig. S3** FE-SEM images of (a) Al<sub>2</sub>O<sub>3</sub>, (b) Ru/Al<sub>2</sub>O<sub>3</sub>, and (c) Ru/0.1Ni-Al<sub>2</sub>O<sub>3</sub>.

**Fig. S4** HAADF-STEM image and elemental mappings of Ru/Al<sub>2</sub>O<sub>3</sub>.

**Fig. S5** HRTEM image of Ru/0.1Ni-Al<sub>2</sub>O<sub>3</sub> (a,b) and Ru/Al<sub>2</sub>O<sub>3</sub> (c,d).

**Fig. S6** High-resolution Ru 3p XPS spectra (a) and Ni 2p XPS spectra (b).

**Fig. S7** XRD patterns of the catalyst after stability testing and the fresh one.

**Table S1** Results of ICP.

**Table S2** Textural parameters of different samples.

**Table S3** Comparison of the catalytic activity of Ru/0.1Ni-Al<sub>2</sub>O<sub>3</sub> presented in this work with the recently reported heterogeneous catalysts for BPA hydrogenation to HBPA.

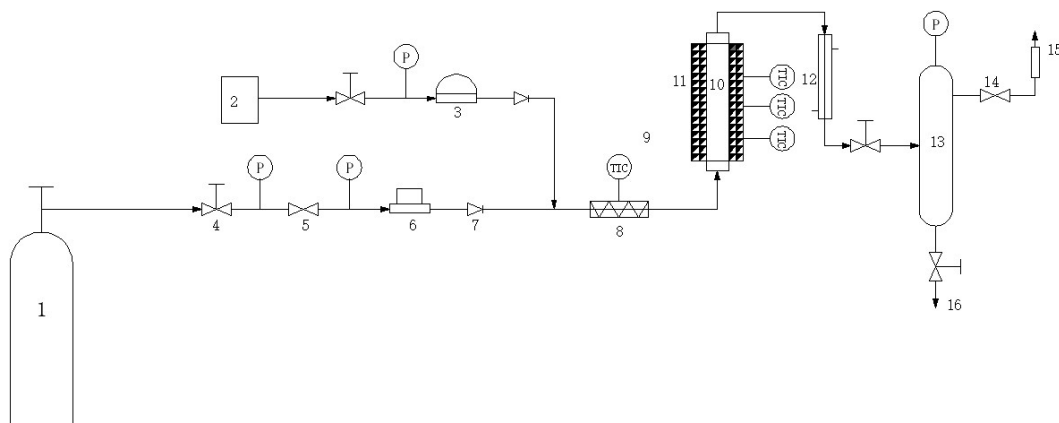

**Fig. S1** Hydrogenation device of BPA.

1-N<sub>2</sub> cylinder, 2-Raw material storage tank, 3-Liquid flow pump, 4-Stop valve, 5-Reducing valve, 6-Wet gas volume flowmeter, 7-Check valve, 8-Mixing preheater, 9-Thermoelectric couple, 10-Reactor, 11-Heating jacket, 12-Condenser, 13-Gas-liquid separator, 14-Stand-by valve, 15-Wet gas flowmeter, and 16-Sampling hatch.

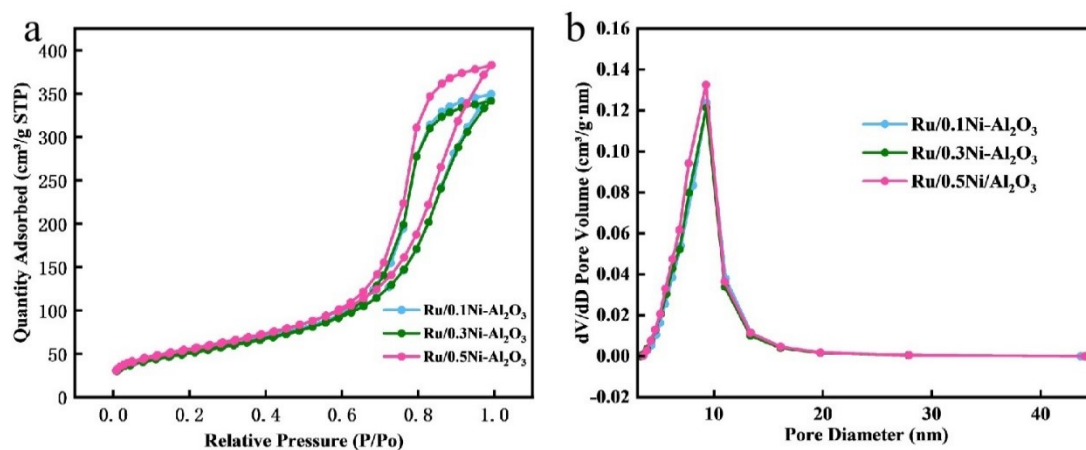

**Fig. S2** N<sub>2</sub> adsorption-desorption isotherms and corresponding pore size distributions of catalysts with varied Ni doping amounts.

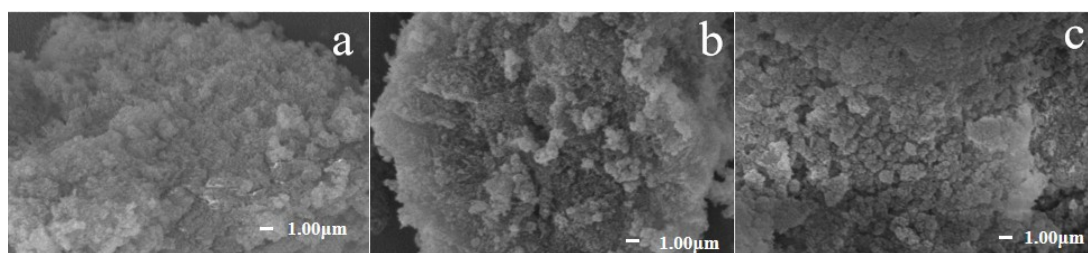

**Fig. S3** FE-SEM images of (a) Al<sub>2</sub>O<sub>3</sub>, (b) Ru/Al<sub>2</sub>O<sub>3</sub>, and (c) Ru/0.1Ni-Al<sub>2</sub>O<sub>3</sub>.

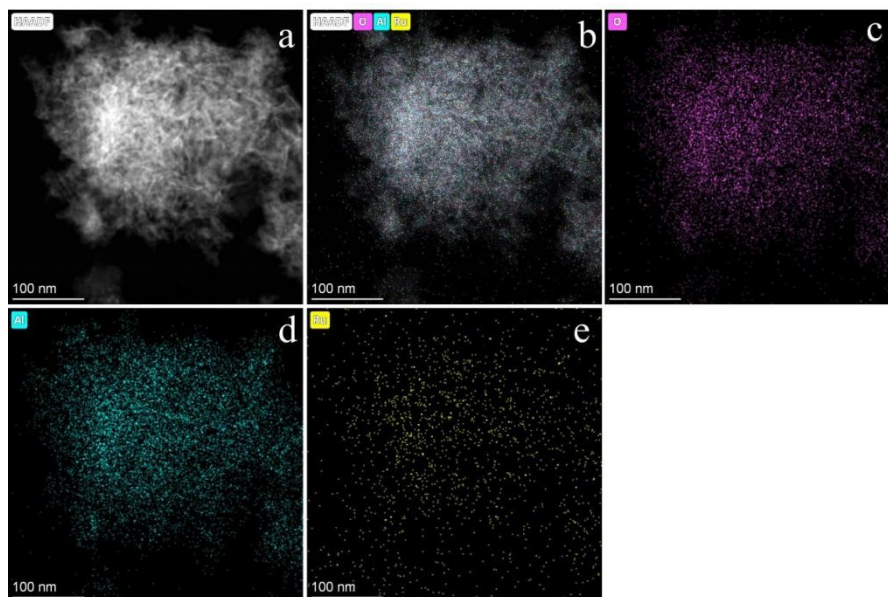

**Fig. S4** (a) HAADF-STEM image and (b-e) elemental mappings of Ru/Al<sub>2</sub>O<sub>3</sub>.

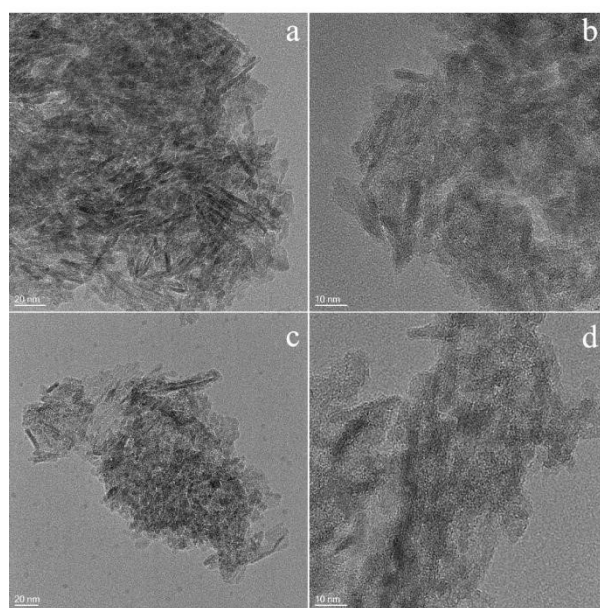

**Fig. S5** HRTEM image of Ru/0.1Ni-Al<sub>2</sub>O<sub>3</sub> (a,b) and Ru/Al<sub>2</sub>O<sub>3</sub> (c,d).

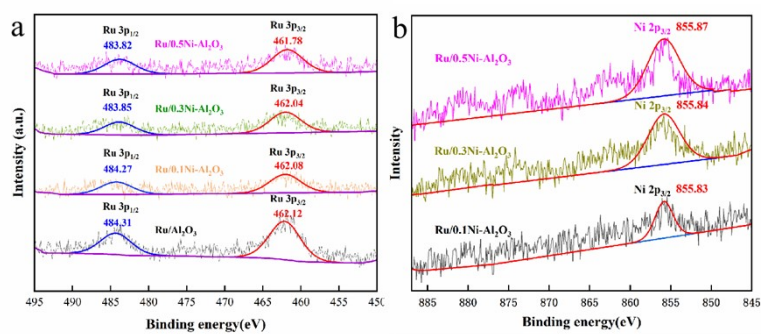

**Fig. S6** High-resolution Ru 3p XPS spectra (a) and Ni 2p XPS spectra (b).

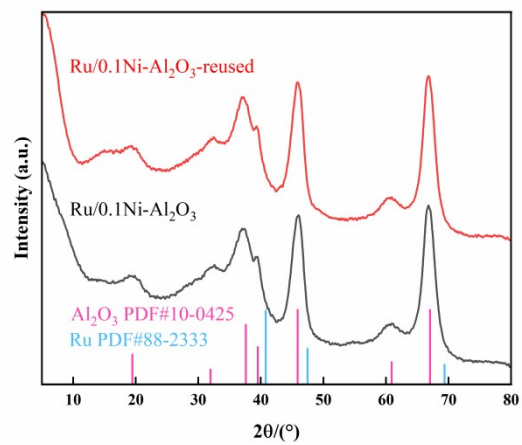

**Fig. S7** XRD patterns of the catalyst after stability testing and the fresh one.

**Table S1** Results of ICP.

| Catalyst                                        | Ru loading  |          | Ni loading  |          |
|-------------------------------------------------|-------------|----------|-------------|----------|
|                                                 | (wt.%)      |          | (wt.%)      |          |
|                                                 | Theoretical | Measured | Theoretical | Measured |
| Ru/Al <sub>2</sub> O <sub>3</sub>               | 0.50        | 0.48     | /           | /        |
| Ru/0.1Ni-Al <sub>2</sub> O <sub>3</sub>         | 0.50        | 0.43     | 0.10        | 0.09     |
| Ru/0.3Ni-Al <sub>2</sub> O <sub>3</sub>         | 0.50        | 0.42     | 0.30        | 0.25     |
| Ru/0.5Ni-Al <sub>2</sub> O <sub>3</sub>         | 0.50        | 0.45     | 0.50        | 0.48     |
| Ru/0.1Ni-Al <sub>2</sub> O <sub>3</sub> -reused | 0.50        | 0.41     | 0.10        | 0.08     |

**Table S2** Textural parameters of different samples.

| Catalyst                                        | Specific surface area             | Pore volume           | Pore diameter |
|-------------------------------------------------|-----------------------------------|-----------------------|---------------|
|                                                 | (m <sup>2</sup> g <sup>-1</sup> ) | (mL g <sup>-1</sup> ) | (nm)          |
| Al <sub>2</sub> O <sub>3</sub>                  | 215.91                            | 0.587                 | 10.38         |
| Ru/Al <sub>2</sub> O <sub>3</sub>               | 210.83                            | 0.587                 | 10.91         |
| Ru/0.1Ni-Al <sub>2</sub> O <sub>3</sub>         | 192.08                            | 0.545                 | 10.64         |
| Ru/0.3Ni-Al <sub>2</sub> O <sub>3</sub>         | 190.24                            | 0.533                 | 10.69         |
| Ru/0.5Ni-Al <sub>2</sub> O <sub>3</sub>         | 201.18                            | 0.597                 | 10.91         |
| Ru/0.1Ni-Al <sub>2</sub> O <sub>3</sub> -reused | 193.81                            | 0.548                 | 9.95          |

**Table S3** Comparison of the catalytic activity of Ru/0.1Ni-Al<sub>2</sub>O<sub>3</sub> presented in this work with the recently reported heterogeneous catalysts for BPA hydrogenation to HBPA.

| Catalyst                                                                     | BPA conversion | HBPA selectivity | Ref.      |
|------------------------------------------------------------------------------|----------------|------------------|-----------|
|                                                                              | (%)            | (%)              |           |
| Ru/0.1Ni-Al <sub>2</sub> O <sub>3</sub>                                      | 100            | 96.4             | This work |
| Ni/Al <sub>2</sub> O <sub>3</sub>                                            | 95.2           | 48.2             | This work |
| Ru/Al <sub>2</sub> O <sub>3</sub>                                            | 100            | 94.5             | This work |
| Pd/Al <sub>2</sub> O <sub>3</sub>                                            | 86.5           | 56.8             | This work |
| Pt/Al <sub>2</sub> O <sub>3</sub>                                            | 88.4           | 56.9             | This work |
| 0.1Pd/Mg <sub>0.2</sub> Al <sub>0.8</sub> O <sub>2.8</sub>                   | 99.2           | 98.2             | S1        |
| 35Ni/4MoO <sub>3</sub> -30ZrO <sub>2</sub> -31Al <sub>2</sub> O <sub>3</sub> | 97             | 94.8             | S2        |
| Raney nickel                                                                 | 100            | 95.1             | S3        |
| CaO, MgO/Raney-nickel                                                        | 100            | 94.1             | S4        |

Reaction conditions: 20 ml catalyst, the catalyst of Ni/Al<sub>2</sub>O<sub>3</sub>, Ru/Al<sub>2</sub>O<sub>3</sub>, Pd/Al<sub>2</sub>O<sub>3</sub> and Pt/Al<sub>2</sub>O<sub>3</sub> of this work 2 to 5 was 0.1 wt.%, 6 MPa H<sub>2</sub>, 130 °C, 0.3 h<sup>-1</sup> LHSV, and 1500:1 hydrogen-oil volume ratio.

## Supplementary references

S1 K. Wu and C. Lee, *US*, 2016, 201514963255.

S2 M. Xiang, B. Ao, Y. Wang, D. Zhou, Z. Jian and X. She, *US*, 2024, 202118258121.

S3 K. Morikawa, S. Hirayama, Y. Ishimura, Y. Suyama, T. Nozawa, H. Monzen, M. Miura, K. Marumo and T. Naito, *US*, 2000, 19970989157.

S4 K. Haruo, O. Masami and K. Toshibumi, *JP*, 1986, 19850104717.
